# Supplementary material
Source: HighWire-hosted journal article supplement (https://www.cmajopen.ca/highwire/filestream/88345/field_highwire_adjunct_files/3/open-2021-0063-original-submission.pdf)
Supplement: open-2021-0063-original-submission.pdf [file open-2021-0063-original-submission.pdf]

1  
2  
3 **Management and clinical outcomes of Lyme disease in acute care facilities: a**  
4 **multicenter cohort study in two endemic regions of Quebec, Canada**  
5  
6  
7  
8  
9

10 Jean Berchmans Musonera<sup>1</sup> MD, Louis Valiquette<sup>1</sup>, MD, MSc, Geneviève Baron<sup>2</sup>, MD, MSc,  
11 François Milord<sup>2</sup>, MD, MSc, Dominique Marcoux<sup>1</sup>, RN, Karine Thivierge<sup>3</sup>, Ph. D., Samuel  
12 Bedard-Dallaire<sup>1</sup>, MD, Andrée Ann Pelletier<sup>1</sup>, MD, Raphaël Lachance<sup>4</sup>, Jeremy Bourget<sup>4</sup>,  
13 Catherine Simard<sup>5</sup>, Emmanuelle Cantin<sup>4</sup>, Farhad Abbasi<sup>4</sup>, Vladimir Prodan<sup>4</sup>, Louis-Patrick  
14 Haraoui<sup>1</sup>, MD, MSc, and Alex Carignan<sup>1</sup>, MD, MSc  
15  
16  
17  
18  
19

20  
21  
22 <sup>1</sup>Department of Microbiology and Infectious Diseases, Université de Sherbrooke,  
23 Sherbrooke, Canada  
24

25  
26  
27 <sup>2</sup>Department of Community Health Sciences, Université de Sherbrooke, Sherbrooke, Canada  
28

29 <sup>3</sup>Laboratoire de santé publique du Québec, Montreal, Canada,  
30

31 <sup>4</sup>Université de Sherbrooke, Faculté de médecine et des Sciences de la santé, Sherbrooke,  
32 Canada,  
33  
34

35  
36 <sup>5</sup>Université Laval, Quebec, Canada  
37

38 **Corresponding author:**  
39

40 Alex Carignan  
41

42  
43 Department of Microbiology and Infectious Diseases, Université de Sherbrooke  
44

45  
46 3001, 12<sup>th</sup> Ave North, Sherbrooke, Quebec J1H 5N4, Canada,  
47  
48

49 Email: Alex.Carignan@USherbrooke.ca  
50  
51

52  
53 **Word counts:** Abstract 245; Article: 2495  
54  
55  
56  
57  
58  
59  
60

1  
2  
3  
4  
5  
6  
7  
8  
9  
10  
11  
12  
13  
14  
15  
16  
17  
18  
19  
20  
21  
22  
23  
24  
25  
26  
27  
28  
29  
30  
31  
32  
33  
34  
35  
36  
37  
38  
39  
40  
41  
42  
43  
44  
45  
46  
47  
48  
49  
50  
51  
52  
53  
54  
55  
56  
57  
58  
59  
60

**Competing interests**

None.

**Funding statement**

This work was supported by the Université de Sherbrooke and the Fonds de recherche Santé Québec..

Confidential

## ABSTRACT

**Background:** We describe the management and clinical evolution of patients with Lyme disease (LD) in acute care facilities in Quebec and assess adherence to the Infectious Disease Society of America (IDSA) guidelines.

**Methods:** We conducted a retrospective multicenter cohort study of patients with serologically confirmed LD in acute care facilities in two endemic regions of Quebec, from 2004 to 2017. Our main outcome was complete resolution of symptoms, 3 months after the initiation of treatment.

**Results:** Medical charts for 272 patients from 14 institutions were considered. Early disseminated LD (n=140; 51.5%) was predominant, followed by localized early (n=90; 33.1%) and late disseminated LD (n=42; 15.4%). Forty-eight patients needed hospitalization for a median of 4 days (IQR 1–7); one death unrelated to LD occurred 589 days after diagnosis. Adherence to IDSA guidelines was observed in 90% of cases and were stable over time (2004–2013: 57/64, 89.1%; 2014–2015: 64/71, 90.1%; 2016–2017: 114/126, 90.5%; p=0.8). Non-adherence to guidelines was predominantly due to a treatment duration longer than recommended (16/26, 61.5%). Resolution of objective signs, 3 months after the initiation of treatment, occurred in 265/267 (99.3%) patients, while post-LD treatment syndrome (PLDTS) was observed in 27 patients (10.1%). PLDTS increased over time (2004–2013: 3/56, 4.6%; 2014–2015: 4/73, 5.5%; 2016–2017: 20/129, 15.5%; p=0.009)

**Interpretation:** We observed a resolution of the clinical signs of LD in most patients. Most treatments complied with the IDSA guidelines. PLDTS was found to emerge, warranting further prospective studies.

## Introduction

Lyme disease (LD), a multisystem infection primarily caused by *Borrelia burgdorferi* in North America (1, 2), progresses in three phases: the early localized disease, the early and the late disseminated phases. (3). The number of LD cases reported by all Canadian provinces increased from 144 in 2009 to 992 in 2016, representing an increase from 0.4 to 2.7 per 100,000 population (4).

In Quebec, LD is a notifiable disease since November 2003 with the first locally acquired case reported in 2006 (5, 6). The number of reported cases of LD and the proportion of cases with acquired infection has increased each year. In 2019, 500 cases of LD were declared to the public health authorities, including 381 (76%) acquired in Quebec, particularly in Estrie (n=226, 59%) and Montérégie (n=102, 27%). Despite this progression in LD cases, little is known about the management and clinical course of LD in Canada. Current evidence focuses on epidemiological surveillance, acquisition risk, and clinical case characteristics (7-9).

We describe the LD case management in acute care facilities in Quebec and the adherence to the Infectious Diseases Society of America (IDSA) guidelines (3). We assessed the clinical course of LD cases treated in Quebec and temporal changes in case severity from 2004 to 2017.

## Methods

### Setting, population and design

1  
2  
3 We conducted a retrospective cohort study in 14 acute care facilities in the Estrie and  
4 Montérégie regions of Quebec, Canada, with populations of 489,479 and 1,421,586  
5 inhabitants in 2019 (10). These acute care facilities include 12 community hospitals as well  
6 as two tertiary care centers, which also get transfers from outside these two regions. The  
7 study population included all patients with serologically confirmed LD as per the two-tiered  
8 testing algorithm currently used in Canada (11) and treated (whether as inpatient and/or  
9 outpatient) in one of the 14 acute care facilities considered. The Centre intégré universitaire  
10 de santé et de services sociaux de l'Estrie-Centre hospitalier universitaire de Sherbrooke  
11 (CIUSSS-CHUS) institutional review board approved this study (project #MP-31-2020-  
12 3251) and waived the need for individual informed consent. Data on serologic status were  
13 extracted from a database at the Laboratoire de santé publique du Québec, where all LD  
14 serology testing results are centralized for the province of Quebec.  
15  
16  
17  
18  
19  
20  
21  
22  
23  
24  
25  
26  
27  
28  
29  
30  
31  
32  
33

### 34 **Data collection and outcomes**

35  
36 Trained research assistants reviewed hospital records using a standardized questionnaire.  
37  
38 Past medical history was collected to calculate the Charlson comorbidity index (12), along  
39 with demographic, microbiological, clinical, and therapeutic data (name of the antibiotic,  
40 dose, route of administration, and start/end dates of treatment).  
41  
42  
43  
44  
45

46  
47 Our main outcome was the proportion of patients with clinical resolution of LD at 90-days,  
48 defined as the complete disappearance of objective clinical signs. Treatment failure was  
49 considered when there was the persistence of at least one objective sign (e.g. persistent facial  
50 palsy or arthritis) 90 days after the initial treatment. Subjective symptoms, such as fatigue  
51  
52  
53  
54  
55  
56  
57  
58  
59  
60

1  
2  
3 or arthralgia, were not considered in the evaluation of the primary outcome. Our secondary  
4  
5 outcome was the presence of a post-treatment Lyme disease syndrome (PTLDS), defined as  
6  
7 the presence of any of the following symptoms : widespread musculoskeletal pain, cognitive  
8  
9 complaints, radicular pain, paresthesias, or dysesthesias. The symptoms also had to begin  
10  
11 within 6 months after the initial diagnosis and treatment of *B. burgdorferi* infection and had  
12  
13 to persist for at least 6 months (3).  
14  
15

16  
17 We formed an adjudication committee consisting of one primary care physician with  
18  
19 expertise in LD (JBM) and two infectious diseases (SBP and AAP) fellows plus a chairperson,  
20  
21 an infectious disease consultant (AC), to independently assess the clinical stage of each LD  
22  
23 case, the adherence of the prescribed treatment with the IDSA guidelines, and the outcomes.  
24  
25 IDSA guideline adherence was assessed according to the clinical stage of each patient,  
26  
27 treatment given, and treatment duration. Reasons for guideline non-adherence were  
28  
29 documented, namely an inadequate antibiotic, dosing or duration. In the case of  
30  
31 disagreements between the two adjudicators, consensus meetings were set to resolve  
32  
33 disagreements with the help of the chairperson.  
34  
35  
36  
37  
38  
39  
40  
41  
42

43 To assess potential changes in Lyme disease presentation, we divided our study into three  
44  
45 periods according to LD incidence in the province of Quebec (2004–2013: low incidence;  
46  
47 2014–2015: moderate incidence; 2016–2017 high incidence)(6). We used regional notifiable  
48  
49 disease registries to assess potential changes in the proportion of serologically confirmed LD  
50  
51 cases managed in acute care facilities.  
52  
53  
54  
55  
56  
57  
58  
59  
60

## Statistical analysis

Data were double-entered into an electronic input tool, Research Electronic Data Capture (Redcap, Vanderbilt University, Nashville, TN, USA), and analyzed using Stata 15.1 for Mac (StataCorp, College Station, TX, USA). Proportions were compared using the  $\chi^2$  test. Continuous variables were compared using the Wilcoxon's rank-sum test or Mood's median test, as appropriate. Cases with missing data were removed from the analysis. To establish risk factors for PTLDS, variables to be included in the multivariate unconditional logistic regression model were selected after univariate analysis by applying a 10% significance level. Variables were added one at a time and retained only if significant in the multivariate model according to the likelihood ratio test. The final model retained variables that significantly enhanced the fit ( $p < 0.05$ ).

## Results

A flow chart detailing the study inclusion and exclusion steps is shown in figure 1. Overall, 1114 positive serologies and PCR tests were extracted from the public health laboratory database. Among these, 316 cases lived in the Estrie/Montérégie regions and were managed in acute care facilities between 2004 and 2017. Finally, 272 cases with complete medical records were analyzed.

### Case characteristics

Most patients were male (169/272; 62.1%) and the median age of the patients was 51.5 years [interquartile range (IQR), 32.6–62.5]. Most cases had no comorbidities, indicated by a Charlson score of 0 for 222/272 (81.6%) of the patients. Only 19 patients (7.0%) had significant immunosuppression. To investigate potential selection bias, we compared patients included and excluded. No significant difference was found between the baseline characteristics of the two groups.

Early disseminated LD (n=140; 51.5%) predominated in our cohort, followed by localized early (n=90; 33.1%), and late disseminated LD (n=42; 15.4%). Of the 140 early disseminated LD patients, 88 (62.9%) had multiple erythema migrans, 40 (28.6%) facial palsy, 30 (21.4%) meningitis, and 9 (6.4%) a radiculopathy. Cardiac involvement presented as carditis (8; 5.7%), first-degree atrioventricular block (4; 2.9%), second-degree atrioventricular block (3; 2.1%), and third-degree atrioventricular block (4; 2.9%). For the 42 late disseminated LD cases, apart for one case of chronic atrophic acrodermatitis (2.4%), all the remaining cases (97.6%) were suffering of arthritis.



1  
2  
3  
4  
5  
6 Forty-eight patients needed hospitalization for a median duration of four days (IQR 1–7). Of  
7  
8 these, seven patients were admitted to the intensive care units (median duration: one day,  
9  
10 IQR 1–4). One death unrelated to LD occurred 589 days after diagnosis.  
11  
12  
13  
14  
15  
16

### 17 **Treatment and adherence to the IDSA guidelines**

18  
19 Antimicrobial treatment comprised doxycycline (n=171, 62.9% of all patients), amoxicillin  
20  
21 or amoxicillin/clavulanic acid (n=39, 14.3%), and ceftriaxone (n=46, 16.9%). The antibiotic  
22  
23 treatment was started after the final immunoblot result was issued in 56 patients (20.6%).  
24  
25 Assessment of guideline adherence was carried out for 261 (95.9%) patients with complete  
26  
27 information available on antibiotic treatment. From these cases, 235 (90.0%) received a  
28  
29 treatment supported by the IDSA guidelines. Non-adherence to the guidelines was either due  
30  
31 to longer than recommended (16/26, 61.5%) or shorter than recommended (n=8/26;  
32  
33 30.8%) treatment duration, and the use of an non-supported antimicrobial (8/26; 30.8%).  
34  
35  
36 In patients with a longer than recommended treatment duration, the median was 28 days  
37  
38 (IQR 27–30), as compared to 20 days in patients with the guideline-recommended treatment  
39  
40 duration (p<0.001).  
41  
42  
43  
44  
45  
46  
47

### 48 **Outcomes assessment**

49  
50 The medical chart had enough data to assess primary and secondary outcomes for 267/272  
51  
52 patients (98.2%). We observed a complete resolution of objective signs of infection in  
53  
54 265/267 (99.3%) patients. The first case of treatment failure was documented in a 20-year-  
55  
56  
57  
58  
59  
60

1  
2  
3 old patient with late disseminated disease (Lyme arthritis) with persistent joint swelling 3  
4 months after the initial treatment. After an additional 60 days of antibiotic therapy, he  
5 presented with persistent arthralgia but without any objective swelling 8 months after the  
6 initial treatment. The second case of treatment failure was a 55-year-old patient treated for  
7 multiple lesions of erythema migrans. Thirty days post-treatment, he developed unilateral  
8 facial palsy that persisted at three months but resolved completely after an additional 21  
9 days of antibiotic therapy. Both patients had a complete resolution of their objective signs  
10 one year after the initial treatment.  
11  
12  
13  
14  
15  
16  
17  
18  
19  
20  
21  
22  
23

24 We documented PLDTS in 27 patients (10.1%). Factors associated with PLDTS in univariate  
25 and multivariate analyses are shown in Table 1. The independent risk factors associated with  
26 PLDTS were arthralgia, tremor, and difficulty concentrating upon initial presentation as well  
27 as a diagnosis of LD in 2016–2017 compared to the 2004–2013 period.  
28  
29  
30  
31  
32  
33  
34  
35

### 36 **Temporal changes in LD characteristics, treatment, and outcomes**

37  
38 To further investigate temporal changes in LD presentation, we compared the case  
39 characteristics diagnosed between 2004 and 2013 (low-incidence period; n=66) versus  
40 those identified in 2014–2015 (moderate-incidence period; n=74) and 2016–2017 (high-  
41 incidence period; n=132) (Table 2). The proportion of serologically confirmed LD cases  
42 decreased significantly over the study period (2004–2013: 66/122, 54.1%; 2014–2015:  
43 74/181, 40.9%; 2016–2017: 132/358, 36.8%;  $p < 0.001$ ). We also observed a non-significant  
44 decrease in the proportion of hospitalizations and referral to specialist physicians over time.  
45  
46  
47  
48  
49  
50  
51  
52  
53  
54  
55  
56  
57  
58  
59  
60

1  
2  
3 IDSA guideline adherence remained stable over time. There was a significant increase in the  
4  
5 proportion of patients who developed PLDTS over time.  
6  
7  
8  
9  
10  
11  
12  
13  
14  
15  
16  
17  
18  
19  
20  
21  
22  
23  
24  
25  
26  
27  
28  
29  
30  
31  
32  
33  
34  
35  
36  
37  
38  
39  
40  
41  
42  
43  
44  
45  
46  
47  
48  
49  
50  
51  
52  
53  
54  
55  
56  
57  
58  
59  
60

Confidential

## Interpretation

Most LD cases treated in 14 acute care institutions of two endemic regions of Quebec who had a complete resolution of objective clinical signs following their treatment received an antimicrobial therapy according to the IDSA guidelines. As our sample includes all acute care institutions within these two regions, we have been able to assess a majority of the more severe cases encountered within these regions. These results are reassuring, in the context where concerns about LD management have recently been raised at the public and political level in Quebec (13). This is the first study assessing LD management with extensive data on antimicrobial management and long-term outcomes in Canadian LD-treated patients.

In more than 99% of cases, clinical signs completely disappeared within 3 months of the start of treatment, and all signs were completely resolved within 1 year of the first antimicrobial treatment. Our results are similar to other studies conducted in North America (14, 15). Therefore, the treatment applied seems effective in eliminating incapacitating clinical signs, such as Bell's palsy. Other studies conducted in pediatric and adult patients have found lower clinical resolution rates (16, 17). This discrepancy may be explained by the fact that these studies included mainly Lyme arthritis cases compared with our study where the proportion of arthritis was only 15%.

Although most patients in our study responded very well to treatment, 10% developed PLDTS. These results are in line with other authors' studies reporting similar proportions of PLDTS (14, 15, 18) but underline the necessity of conducting well-designed prospective basic and clinical science studies to gain a better understanding of both causes and treatment

1  
2  
3 options for patients with PLDTS, a distressing condition for affected patients (19). Our study  
4  
5 may also provide new insights and help clinicians identify patients at a risk of developing  
6  
7 PLDTS, as we identified initial symptoms (arthralgia and tremor) that, if present, may reflect  
8  
9 the higher odds of developing PLDTS. These risk factors have been previously described with  
10  
11 the European variants of LD (20, 21) but not previously in North American soil. Additionally,  
12  
13 we documented a significant increase in the proportion of PLDTS in the recent years. We  
14  
15 hypothesize that as both clinicians and the general public become increasingly familiar with  
16  
17 LD, they are increasingly questioning and reporting the associated symptoms.  
18  
19  
20  
21

22  
23  
24 Our work emphasized the importance of improving turnaround time for LD diagnosis in  
25  
26 Quebec and Canada, plateauing at almost 40 days since 2004. This is important as almost one  
27  
28 quarter of all treatments in our cohort were initiated after the issuance of the immunoblot  
29  
30 test results. For many years, most provincial public health or hospital laboratories have  
31  
32 performed enzyme immunoassay testing locally, while immunoblot testing was performed  
33  
34 at the National Microbiology Laboratory in Winnipeg. The implementation of immunoblot  
35  
36 testing in provincial public health labs might help decrease these turnaround times and  
37  
38 eventually decrease treatment delays for patients (22).  
39  
40  
41  
42  
43

44  
45 We observed an overall adherence of 90% to the IDSA LD guidelines, which is lower than  
46  
47 adherence rates previously published in other contexts . Adherence rates of 100% in a small  
48  
49 sample of patients with erythema migrans were found without mentioning the criteria for  
50  
51 guideline adherence and treatment information was available in only 25% of reported cases.  
52  
53 (23) Another study conducted in a hyperendemic area of Wisconsin, USA, showed treatment  
54  
55  
56  
57  
58  
59  
60

1  
2  
3 adherence with IDSA recommendations in 99.9% of cases (15) but included only cases of  
4  
5 early LD and the only criterion to compare treatment to the IDSA guidelines was the type of  
6  
7 antimicrobial used. We considered more stringent comparison criteria as a treatment to be  
8  
9 deemed as adequate needed to include the right molecule, at the right dosage, and for an  
10  
11 adequate duration, which might explain the lower adherence rates. Our population was  
12  
13 restricted to patients consulting in acute care facilities, reflecting more complex cases  
14  
15 compared to patients seen in primary care practices. In the case of non-adherence to the  
16  
17 IDSA guidelines, the main reason identified was a longer treatment duration. As prolonged  
18  
19 antimicrobial therapy for the treatment of LD has not shown greater efficacy compared with  
20  
21 shorter-duration regimens (14, 24, 25), it is important to educate clinicians about the  
22  
23 dangers of prolonged treatment, which may bring significant risks, such as *Clostridioides*  
24  
25 *difficile* colitis (26).  
26  
27  
28  
29  
30  
31  
32  
33

34 We found that the proportion of serologically confirmed LD cases managed in acute care  
35  
36 facilities, a complex population, decreased significantly over time. Studies carried out in  
37  
38 North America have found a gradual increase in the proportion of cases in the early localized  
39  
40 phase, which consequently implies a gradual decrease in the proportion of severe LD cases  
41  
42 (7, 27-29). Over time, clinicians become more familiar with LD and diagnose and treat the  
43  
44 disease early, thus preventing the passage to more advanced stages.  
45  
46  
47  
48  
49

## 50 **Limitations**

51  
52 The main limitation of our study is its retrospective nature, which could introduce  
53  
54 information bias. We were able to minimize this by including specialized research assistants  
55  
56  
57  
58  
59  
60

1  
2  
3 who ensured complete data collection. We also had limited power to significantly confirm  
4 several indicators of increasing awareness and familiarity with LD in both patients  
5 (decreasing time to the first consultation) and clinicians (decrease in time between first  
6 symptoms and treatment initiation and decrease in specialists). Finally, the guidelines in  
7 effect during the study period have not been updated since 2006. However, their validity was  
8 confirmed in 2010 (30) and the Quebec recommendations, issued in 2019, did not lead to  
9 any major changes compared to the IDSA recommendations (31).  
10  
11  
12  
13  
14  
15  
16  
17  
18  
19  
20  
21

## 22 **Conclusion**

23  
24 In this retrospective multicenter cohort study in two endemic regions of Quebec, Canada, we  
25 found a resolution of the objective signs of LD in most patients and that most treatments  
26 complied with the IDSA guidelines. Finally, we describe the emergence of PLDTS. This finding  
27 warrants further investigation in prospective studies.  
28  
29  
30  
31  
32  
33  
34  
35  
36  
37  
38  
39  
40  
41  
42  
43  
44  
45  
46  
47  
48  
49  
50  
51  
52  
53  
54  
55  
56  
57  
58  
59  
60

**References:**

1. Arvikar SL, Steere AC. Diagnosis and treatment of Lyme arthritis. *Infect Dis Clin North Am* 2015;29(2):269–80.
2. Ogden NH, Koffi JK, Pelcat Y, Lindsay LR. Environmental risk from Lyme disease in central and eastern Canada: a summary of recent surveillance information. *Can Commun Dis Rep* 2014;40(5):74–82.
3. Wormser GP, Dattwyler RJ, Shapiro ED, Halperin JJ, Steere AC, Klempner MS, et al. The clinical assessment, treatment, and prevention of Lyme disease, human granulocytic anaplasmosis, and babesiosis: clinical practice guidelines by the Infectious Diseases Society of America. *Clin Infect Dis* 2006;43(9):1089–134.
4. Gouvernement du Canada [internet]. Surveillance of Lyme disease; 2020 May 12 [cited 2020 September 17]. Available from: <https://www.canada.ca/en/public-health/services/diseases/lyme-disease/surveillance-lyme-disease.html>.
5. Institut national de santé publique du Québec. La maladie de Lyme -Guide d'intervention [cited 2020 September 17]. Available from <https://numerique.banq.qc.ca/patrimoine/details/52327/2316177>
6. Institut national de santé publique du Québec. Résultats annuels de surveillance de la maladie de Lyme [cited 2020 September 17]. Available from <https://www.inspq.qc.ca/node/14951>
7. Hatchette TF, Johnston BL, Schleihauf E, Mask A, Haldane D, Drebot M, et al. Epidemiology of Lyme Disease, Nova Scotia, Canada, 2002-2013. *Emerg Infect Dis* 2015;21(10):1751–8.
8. Ripoche M, Gasmi S, Adam-Poupart A, Koffi JK, Lindsay LR, Ludwig A, et al. Passive Tick Surveillance Provides an Accurate Early Signal of Emerging Lyme Disease Risk and Human Cases in Southern Canada. *J Med Entomol* 2018; 55(4):1016–26.



- 1  
2  
3 9. Charbonneau A, Charette L-P, Rouleau G, Savary M, Wilson A, Heer E, et al. Clinical  
4 presentation of Lyme disease in the higher-risk region of Quebec: a retrospective descriptive study.  
5 CMAJ Open 2018;6(1):E139–E45.  
6  
7
- 8  
9 10. Ministère de la Santé et des Services sociaux. Estimations et projections de population par  
10 territoire sociosanitaire [cited 2020 September 17] Available from :  
11 <https://publications.msss.gouv.qc.ca/msss/document-001617/>  
12  
13
- 14  
15 11. Lindsay LR, Bernat K, Dibernardo A. Laboratory diagnostics for Lyme disease. Can Commun  
16 Dis Rep 2014;40(11):209–17.  
17
- 18  
19 12. Charlson ME, Pompei P, Ales KL, MacKenzie CR. A new method of classifying prognostic  
20 comorbidity in longitudinal studies: development and validation. J Chronic Dis 1987;40(5):373–83.  
21  
22
- 23  
24 13. Commission de la santé et des services sociaux. Étude de pétitions concernant l'instauration  
25 et l'application d'un plan d'intervention relatif à la maladie de Lyme : observations, conclusions et  
26 recommandations [cited September 17 2020]. Available from [http://www.assnat.qc.ca/fr/travaux-](http://www.assnat.qc.ca/fr/travaux-parlementaires/commissions/csss/mandats/Mandat-39379/index.html)  
27 [parlementaires/commissions/csss/mandats/Mandat-39379/index.html](http://www.assnat.qc.ca/fr/travaux-parlementaires/commissions/csss/mandats/Mandat-39379/index.html).  
28  
29
- 30  
31 14. Wormser GP, Ramanathan R, Nowakowski J, McKenna D, Holmgren D, Visintainer P, et al.  
32 Duration of antibiotic therapy for early Lyme disease. A randomized, double-blind, placebo-  
33 controlled trial. Ann Intern Med 2003;138(9):697–704.  
34  
35
- 36  
37 15. Kowalski TJ, Tata S, Berth W, Mathiason MA, Agger WA. Antibiotic treatment duration and  
38 long-term outcomes of patients with early lyme disease from a lyme disease-hyperendemic area. Clin  
39 Infect Dis 2010;50(4):512–20.  
40  
41
- 42  
43 16. Tory HO, Zurakowski D, Sundel RP. Outcomes of children treated for Lyme arthritis: results  
44 of a large pediatric cohort. J Rheumatol 2010;37(5):1049–55.  
45  
46
- 47  
48 17. Ogden NH, Gasmi S, Koffi JK, Barton M, Lindsay LR, Langley JM. Lyme disease in children: Data  
49 from the Canadian Paediatric Surveillance Program. Ticks Tick Borne Dis 2020;11(2):101347.  
50  
51  
52  
53  
54  
55  
56  
57  
58  
59  
60

- 1  
2  
3 18. Stupica D, Lusa L, Ruzić-Sabljić E, Cerar T, Strle F. Treatment of erythema migrans with  
4 doxycycline for 10 days versus 15 days. *Clin Infect Dis* 2012;55(3):343–50.  
5  
6
- 7 19. Aucott JN, Rebman AW, Crowder LA, Kortte KB. Post-treatment Lyme disease syndrome  
8 symptomatology and the impact on life functioning: is there something here? *Qual Life Res*  
9 2013;22(1):75–84.  
10  
11
- 12 20. Eikeland R, Mygland A, Herlofson K, Ljøstad U. Risk factors for a non-favorable outcome after  
13 treated European neuroborreliosis. *Acta Neurol Scand* 2013;127(3):154–60.  
14  
15
- 16 21. Błaut-Jurkowska J, Jurkowski M. [Post-Lyme disease syndrome]. *Pol Merkur Lekarski*  
17 2016;40(236):129–33.  
18  
19
- 20 22. Modified two-tiered testing algorithm for Lyme disease serology: the Canadian context. *Can*  
21 *Commun Dis Rep* 2020;46(5):125–31.  
22  
23
- 24 23. Gasmi S, Ogden NH, Leighton PA, Adam-Poupart A, Milord F, Lindsay LR, et al. Practices of  
25 Lyme disease diagnosis and treatment by general practitioners in Quebec, 2008–2015. *BMC Fam*  
26 *Pract* 2017;18(1):65.  
27  
28
- 29 24. Klempner MS, Hu LT, Evans J, Schmid CH, Johnson GM, Trevino RP, et al. Two controlled trials  
30 of antibiotic treatment in patients with persistent symptoms and a history of Lyme disease. *N Engl J*  
31 *Med* 2001;345(2):85–92.  
32  
33
- 34 25. Maloney EL. Re: A randomized, placebo-controlled trial of repeated IV antibiotic therapy for  
35 Lyme encephalopathy. Prolonged Lyme disease treatment: enough is enough. *Neurology*  
36 2009;72(4):384–5; author reply 5.  
37  
38
- 39 26. Marzec NS, Nelson C, Waldron PR, Blackburn BG, Hosain S, Greenhow T, et al. Serious bacterial  
40 infections acquired during treatment of patients given a diagnosis of chronic Lyme disease - United  
41 States. *MMWR Morb Mortal Wkly Rep* 2017;66(23):607–9.  
42  
43
- 44 27. Johnson KO, Nelder MP, Russell C, Li Y, Badiani T, Sander B, et al. Clinical manifestations of  
45 reported Lyme disease cases in Ontario, Canada: 2005-2014. *PLoS One* 2018;13(6):e0198509.  
46  
47  
48  
49  
50  
51  
52  
53  
54  
55  
56  
57  
58  
59  
60

1  
2  
3 28. Schwartz AM, Hinckley AF, Mead PS, Hook SA, Kugeler KJ. Surveillance for Lyme Disease -  
4 United States, 2008–2015. *MMWR Surveill Summ* 2017;66(22):1–12.  
5

6  
7 29. Gasmi S, Ogden NH, Lindsay LR, Burns S, Fleming S, Badcock J, et al. Surveillance for Lyme  
8 disease in Canada: 2009–2015. *Can Commun Dis Rep* 2017;43(10):194–9.  
9  
10  
11  
12  
13  
14  
15  
16  
17  
18  
19  
20  
21  
22  
23  
24  
25  
26  
27  
28  
29  
30  
31  
32  
33  
34  
35  
36  
37  
38  
39  
40  
41  
42  
43  
44  
45  
46  
47  
48  
49  
50  
51  
52  
53  
54  
55  
56  
57  
58  
59  
60

Confidential

1  
2  
3 **Table and figure titles**  
4

5 **Figure 1:** Study flowchart  
6

7  
8 **Table 1:** Characteristics of patients with and without post-Lyme disease treatment  
9  
10 syndrome (PLDTS)  
11

12 **Table 2:** Characteristics of patients with Lyme disease according to study periods  
13  
14  
15  
16  
17  
18  
19  
20  
21  
22  
23  
24  
25  
26  
27  
28  
29  
30  
31  
32  
33  
34  
35  
36  
37  
38  
39  
40  
41  
42  
43  
44  
45  
46  
47  
48  
49  
50  
51  
52  
53  
54  
55  
56  
57  
58  
59  
60

Confidential

1  
2  
3  
4  
5  
6  
7  
8  
9  
10  
11  
12  
13  
14  
15  
16  
17  
18  
19  
20  
21  
22  
23  
24  
25  
26  
27  
28  
29  
30  
31  
32  
33  
34  
35  
36  
37  
38  
39  
40  
41  
42  
43  
44  
45  
46  
47  
48  
49  
50  
51  
52  
53  
54  
55  
56  
57  
58  
59  
60

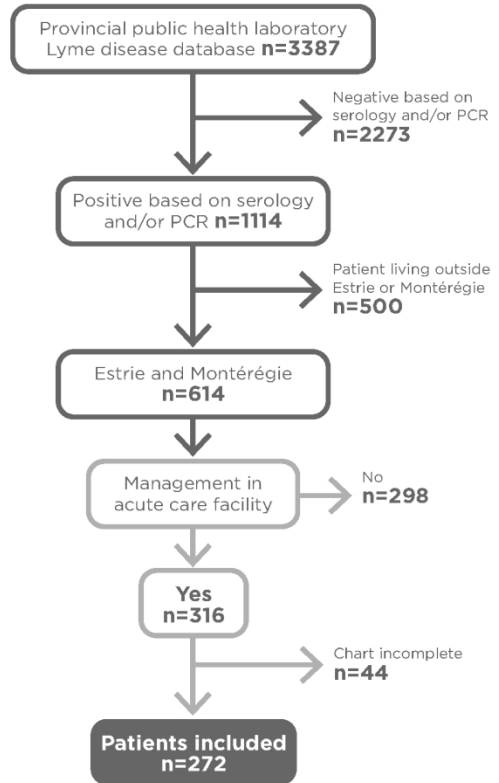

Figure 1: Study flowchart  
215x279mm (200 x 200 DPI)

1  
2  
3  
4  
5  
6  
7  
8  
9  
10  
11  
12  
13  
14  
15  
16  
17  
18  
19  
20  
21  
22  
23  
24  
25  
26  
27  
28  
29  
30  
31  
32  
33  
34  
35  
36  
37  
38  
39  
40  
41  
42  
43  
44  
45  
46  
47

**Table 1: Characteristics of patients with and without post-Lyme disease treatment syndrome (PLDTS)**

| Risk factors                      | PLDTS<br>n (%)<br>n=27 | No PLDTS<br>n (%)<br>n=240 | Crude<br>odds ratios<br>(95% CI) | p-value | Adjusted<br>odds ratios<br>(95% CI) | p-<br>value |
|-----------------------------------|------------------------|----------------------------|----------------------------------|---------|-------------------------------------|-------------|
| <b>Sex</b>                        |                        |                            |                                  |         |                                     |             |
| Female                            | 8 (29.6)               | 94 (39.2)                  |                                  |         |                                     |             |
| Male                              | 19 (70.4)              | 146 (60.8)                 | 0.7 (0.3–1.6)                    | 0.3     |                                     |             |
| <b>Age category</b>               |                        |                            |                                  |         |                                     |             |
| <18 year                          | 2 (7.4)                | 37 (15.5)                  |                                  |         |                                     |             |
| 18–64 years                       | 21 (77.8)              | 145 (60.7)                 | 2.7 (0.6-11.9)                   | 0.2     |                                     |             |
| 65 years and more                 | 4 (14.8)               | 57 (23.9)                  | 1.3 (0.23-7.45)                  | 0.8     |                                     |             |
| <b>Symptoms upon presentation</b> |                        |                            |                                  |         |                                     |             |
| Arthralgia                        | 16 (59.3)              | 70 (29.2)                  | 3.5 (1.6–7.9)                    | 0.002   | 2.8 (1.2–6.7)                       | 0.02        |
| Headache                          | 19 (70.4)              | 126 (52.5)                 | 2.2 (0.9–5.1)                    | 0.08    |                                     |             |
| Myalgias                          | 13 (48.2)              | 100 (41.7)                 | 1.3 (0.6–2.9)                    | 0.5     |                                     |             |
| Fatigue                           | 19 (70.4)              | 138 (57.5)                 | 1.8 (0.7–4.2)                    | 0.2     |                                     |             |
| Insomnia                          | 5 (18.5)               | 30 (12.5)                  | 1.6 (0.6–4.5)                    | 0.4*    |                                     |             |
| Tremor                            | 4 (14.8)               | 5 (2.1)                    | 8.2 (2.1–32.6)                   | 0.007*  | 4.7 (1.1–20.0)                      | 0.04        |
| Paresthesias                      | 7 (25.9)               | 32 (13.3)                  | 2.3 (0.9–5.8)                    | 0.08*   |                                     |             |
| Difficulty concentrating          | 4 (14.8)               | 8 (3.3)                    | 5.1 (1.4–18.1)                   | 0.02*   | 3.4 (0.08–14.1)                     | 0.08        |
| <b>Clinical stage</b>             |                        |                            |                                  |         |                                     |             |
| Early localized                   | 6 (22.27)              | 84 (35.0)                  | 1                                |         |                                     |             |

|    |                       |           |            |                  |      |            |     |
|----|-----------------------|-----------|------------|------------------|------|------------|-----|
| 1  |                       |           |            |                  |      |            |     |
| 2  |                       |           |            |                  |      |            |     |
| 3  | Early disseminated    | 15 (55.6) | 121(50.4)  | 1.7 (0.7–7.9)    | 0.2  |            |     |
| 4  | Late disseminated     | 6 (22.2)  | 35 (14.6)  | 2.4 (0.6–4.7)    | 0.3  |            |     |
| 5  |                       |           |            |                  |      |            |     |
| 6  |                       |           |            |                  |      |            |     |
| 7  | <b>Study period</b>   |           |            |                  |      |            |     |
| 8  | 2004–2013             | 3 (11.1)  | 62 (25.8)  | 1                |      | 1          |     |
| 9  | 2014–2015             | 4 (14.8)  | 69 (28.8)  | 1.2 (0.3–5.6)    | 0.8  | 1.3 (1.03– | 0.7 |
| 10 |                       |           |            |                  |      | 13.9)      |     |
| 11 |                       |           |            |                  |      |            |     |
| 12 | 2016–2017             | 20 (74.1) | 109 (45.4) | 3.8 (1.1 – 13.4) | 0.04 | 3.7 (1.03– |     |
| 13 |                       |           |            |                  |      | 13.9)      |     |
| 14 |                       |           |            |                  |      |            |     |
| 15 | * Fisher's exact test |           |            |                  |      |            |     |

Confidential

1  
2  
3  
4  
5  
6  
7  
8  
9  
10  
11  
12  
13  
14  
15  
16  
17  
18  
19  
20  
21  
22  
23  
24  
25  
26  
27  
28  
29  
30  
31  
32  
33  
34  
35  
36  
37  
38  
39  
40  
41  
42  
43  
44  
45  
46  
47

**Table 2: Characteristics of patients with Lyme disease according to study periods**

|                                   | <b>2004–2013</b> | <b>2014–2015</b> | <b>2016–2017</b> | <b>p-value</b> |
|-----------------------------------|------------------|------------------|------------------|----------------|
|                                   | <b>n=66</b>      | <b>n=74</b>      | <b>n=132</b>     |                |
|                                   | <b>n (%)</b>     | <b>n (%)</b>     | <b>n (%)</b>     |                |
| <b>Age [years, median (IQR)]</b>  | 50.0 (31.6–63.2) | 47.8 (28.9–59.6) | 53.3 (35.5–64.2) | 0.2*           |
| <b>Age category</b>               |                  |                  |                  |                |
| <18                               | 10 (15.4)        | 12 (16.2)        | 17 (12.9)        |                |
| 18–64 years                       | 41 (63.1)        | 50 (67.6)        | 80 (60.6)        |                |
| 65 years and more                 | 14 (21.5)        | 13 (16.2)        | 35 (26.5)        | 0.6            |
| <b>Sex</b>                        |                  |                  |                  |                |
| Female                            | 28 (42.4)        | 22 (29.7)        | 53 (40.2)        |                |
| Male                              | 38(57.6)         | 52 (70.3)        | 79 (59.8)        | 0.2            |
| <b>Charlson comorbidity index</b> |                  |                  |                  |                |
| 0                                 | 55 (83.3)        | 60 (60.4)        | 107 (81.1)       |                |
| 1–2                               | 10 (15.2)        | 13 (17.6)        | 85 (11.4)        |                |
| 3 and more                        | 1 (1.5)          | 11 (1.4)         | 10 (7.6)         | 0.2            |



|                                                                                   |               |                  |               |      |
|-----------------------------------------------------------------------------------|---------------|------------------|---------------|------|
| <b>Lyme disease stage</b>                                                         |               |                  |               |      |
| Early localized                                                                   | 17 (25.8)     | 26 (35.2)        | 47 (35.6)     |      |
| Early Disseminated                                                                | 41 (62.1)     | 34 (45.9)        | 65 (49.2)     |      |
| Late disseminated                                                                 | 8 (12.1)      | 14 (18.9)        | 20 (15.2)     | 0.5  |
| <b>Adherence to IDSA recommendations</b>                                          | 57/64 (89.1)  | 64/71(90.1)      | 114/126(90.5) | 0.9  |
| <b>Hospitalization</b>                                                            | 15 (22,7)     | 16 (21,6)        | 17(12,9)      | 0.1  |
| <b>Time to first consultation (days, median, IQR)</b>                             | 7 (2–21)      | 4 (1–10)         | 3.5 (0–11)    | 0.3* |
| <b>Time between first symptoms and treatment initiation (days, median, IQR)</b>   | 18.5(9–34)    | 17 (4–35)        | 12 (4–33)     | 0.2* |
| <b>Time between serology sampling and Western blot result (days, median, IQR)</b> | 37.5 ((29–47) | 38.5 (30.5–42.5) | 39 (34–43)    | 1.0* |
| <b>Reference to specialist physican</b>                                           | 59 (89,4)     | 60 (81,1)        | 103 (78.0)    | 0.06 |

1  
2  
3  
4  
5  
6  
7  
8  
9  
10  
11  
12  
13  
14  
15  
16  
17  
18  
19  
20  
21  
22  
23  
24  
25  
26  
27  
28  
29  
30  
31  
32  
33  
34  
35  
36  
37  
38  
39  
40  
41  
42  
43  
44  
45  
46  
47

|                                               |             |              |               |       |
|-----------------------------------------------|-------------|--------------|---------------|-------|
| <b>Resolution of clinical objective signs</b> | 65/65 (100) | 72/73 (98.6) | 128/129(99.2) | 0.7   |
| <b>Post-Lyme disease treatment syndrome</b>   | 3/56 (4.6)  | 4/73 (5.5)   | 20/129 (15.5) | 0.009 |

\*Mood’s median test of independent samples

Confidential

STROBE Statement—Checklist of items that should be included in reports of *cohort studies*

|                              | Item No | Recommendation                                                                                                                                                                                    | Page No        |
|------------------------------|---------|---------------------------------------------------------------------------------------------------------------------------------------------------------------------------------------------------|----------------|
| <b>Title and abstract</b>    | 1       | (a) Indicate the study's design with a commonly used term in the title or the abstract                                                                                                            | 3              |
|                              |         | (b) Provide in the abstract an informative and balanced summary of what was done and what was found                                                                                               | 3              |
| <b>Introduction</b>          |         |                                                                                                                                                                                                   |                |
| Background/rationale         | 2       | Explain the scientific background and rationale for the investigation being reported                                                                                                              | 4              |
| Objectives                   | 3       | State specific objectives, including any prespecified hypotheses                                                                                                                                  | 4              |
| <b>Methods</b>               |         |                                                                                                                                                                                                   |                |
| Study design                 | 4       | Present key elements of study design early in the paper                                                                                                                                           | 5              |
| Setting                      | 5       | Describe the setting, locations, and relevant dates, including periods of recruitment, exposure, follow-up, and data collection                                                                   | 5              |
| Participants                 | 6       | (a) Give the eligibility criteria, and the sources and methods of selection of participants. Describe methods of follow-up                                                                        | 5              |
|                              |         | (b) For matched studies, give matching criteria and number of exposed and unexposed                                                                                                               | -              |
| Variables                    | 7       | Clearly define all outcomes, exposures, predictors, potential confounders, and effect modifiers. Give diagnostic criteria, if applicable                                                          | 5-6            |
| Data sources/<br>measurement | 8*      | For each variable of interest, give sources of data and details of methods of assessment (measurement). Describe comparability of assessment methods if there is more than one group              | 5-6            |
| Bias                         | 9       | Describe any efforts to address potential sources of bias                                                                                                                                         | 15             |
| Study size                   | 10      | Explain how the study size was arrived at                                                                                                                                                         | 5              |
| Quantitative variables       | 11      | Explain how quantitative variables were handled in the analyses. If applicable, describe which groupings were chosen and why                                                                      | 6              |
| Statistical methods          | 12      | (a) Describe all statistical methods, including those used to control for confounding                                                                                                             | 7              |
|                              |         | (b) Describe any methods used to examine subgroups and interactions                                                                                                                               | N/A            |
|                              |         | (c) Explain how missing data were addressed                                                                                                                                                       | 7              |
|                              |         | (d) If applicable, explain how loss to follow-up was addressed                                                                                                                                    | N/A            |
|                              |         | (e) Describe any sensitivity analyses                                                                                                                                                             | N/A            |
| <b>Results</b>               |         |                                                                                                                                                                                                   |                |
| Participants                 | 13*     | (a) Report numbers of individuals at each stage of study—eg numbers potentially eligible, examined for eligibility, confirmed eligible, included in the study, completing follow-up, and analysed | Fig1           |
|                              |         | (b) Give reasons for non-participation at each stage                                                                                                                                              | Fig 1          |
|                              |         | (c) Consider use of a flow diagram                                                                                                                                                                | Fig 1          |
| Descriptive data             | 14*     | (a) Give characteristics of study participants (eg demographic, clinical, social) and information on exposures and potential confounders                                                          | 8              |
|                              |         | (b) Indicate number of participants with missing data for each variable of interest                                                                                                               | Tables 1 and 2 |
|                              |         | (c) Summarise follow-up time (eg, average and total amount)                                                                                                                                       | N/A            |
| Outcome data                 | 15*     | Report numbers of outcome events or summary measures over time                                                                                                                                    | 9-10           |

|    |                          |    |                                                                                                                                                                                                              |              |
|----|--------------------------|----|--------------------------------------------------------------------------------------------------------------------------------------------------------------------------------------------------------------|--------------|
| 1  | Main results             | 16 | (a) Give unadjusted estimates and, if applicable, confounder-adjusted estimates and their precision (eg, 95% confidence interval). Make clear which confounders were adjusted for and why they were included | Tables 1-2   |
| 2  |                          |    | (b) Report category boundaries when continuous variables were categorized                                                                                                                                    | Tables 1-2   |
| 3  |                          |    | (c) If relevant, consider translating estimates of relative risk into absolute risk for a meaningful time period                                                                                             | Not relevant |
| 4  |                          |    |                                                                                                                                                                                                              |              |
| 5  | Other analyses           | 17 | Report other analyses done—eg analyses of subgroups and interactions, and sensitivity analyses                                                                                                               | Not relevant |
| 6  |                          |    |                                                                                                                                                                                                              |              |
| 7  | <b>Discussion</b>        |    |                                                                                                                                                                                                              |              |
| 8  | Key results              | 18 | Summarise key results with reference to study objectives                                                                                                                                                     | 12           |
| 9  | Limitations              | 19 | Discuss limitations of the study, taking into account sources of potential bias or imprecision. Discuss both direction and magnitude of any potential bias                                                   | 15           |
| 10 | Interpretation           | 20 | Give a cautious overall interpretation of results considering objectives, limitations, multiplicity of analyses, results from similar studies, and other relevant evidence                                   | 12-14        |
| 11 | Generalisability         | 21 | Discuss the generalisability (external validity) of the study results                                                                                                                                        | 12           |
| 12 | <b>Other information</b> |    |                                                                                                                                                                                                              |              |
| 13 | Funding                  | 22 | Give the source of funding and the role of the funders for the present study and, if applicable, for the original study on which the present article is based                                                | 2            |

26 \*Give information separately for exposed and unexposed groups.

29 **Note:** An Explanation and Elaboration article discusses each checklist item and gives methodological background and published examples of transparent reporting. The STROBE checklist is best used in conjunction with this article (freely available on the Web sites of PLoS Medicine at <http://www.plosmedicine.org/>, Annals of Internal Medicine at <http://www.annals.org/>, and Epidemiology at <http://www.epidem.com/>). Information on the STROBE Initiative is available at <http://www.strobe-statement.org>.
